# Supplementary material for: Integrin Beta 3 Regulates Cellular Senescence by Activating the TGF-β Pathway
Source: PubMed Central journal article supplement (PMC5357738; doi:10.1016/j.celrep.2017.02.012), 2017-03-07
Supplement: mmc1.pdf [file mmc1.pdf]

**Cell Reports, Volume 18**

**Supplemental Information**

**Integrin Beta 3 Regulates Cellular Senescence**

**by Activating the TGF- $\beta$  Pathway**

**Valentina Rapisarda, Michela Borghesan, Veronica Miguela, Vesela Encheva, Ambrosius P. Snijders, Amaia Lujambio, and Ana O'Loughlen**

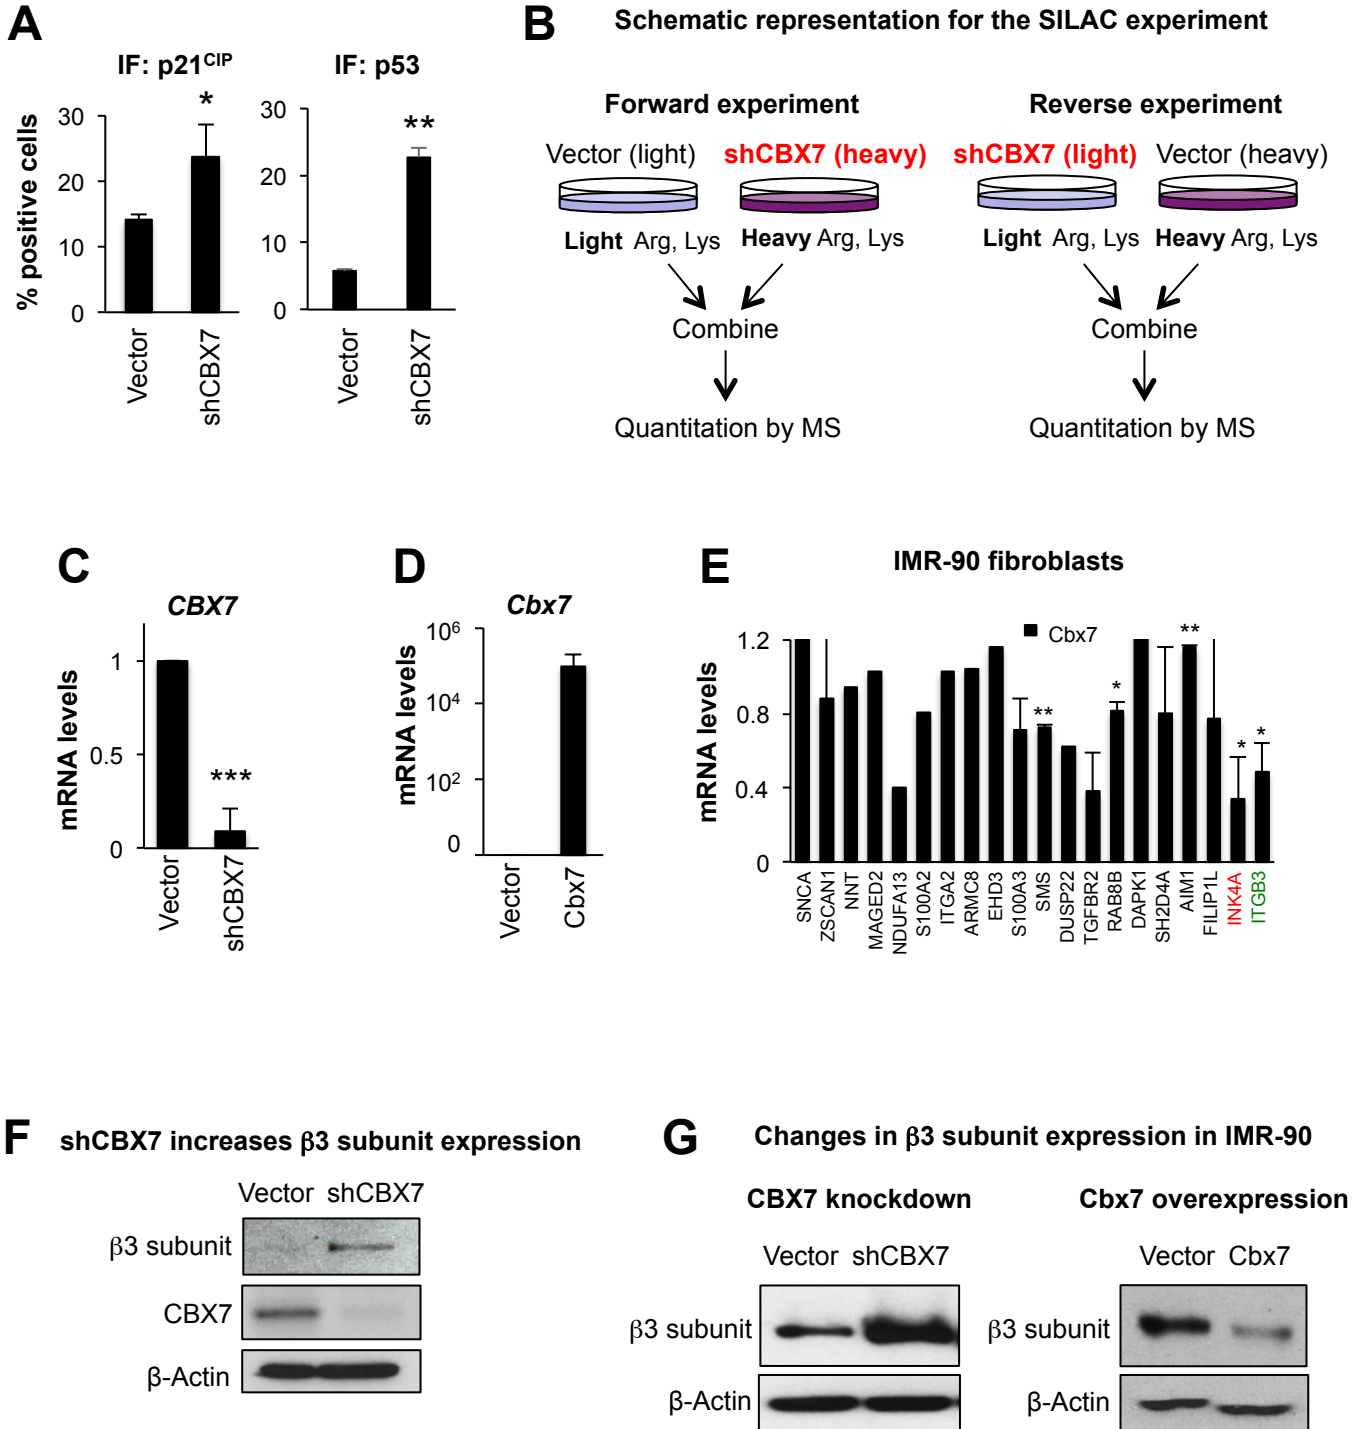

**Figure S1. CBX7 knockdown induces senescence in human primary breast fibroblasts (Related to Figures 1 and 2)**

(A) Knockdown of *CBX7* (shCBX7) in BF fibroblasts induces an increase in the percentage of cells staining positive for p53 and p21<sup>CIP</sup>. (B) Scheme for the strategy followed to perform the SILAC experiment. In the forward experiment, we grow BF infected with shCBX7 in the media containing “heavy aminoacids”, whereas in the reverse experiment we culture shCBX7 cells in the media with “light aminoacids”. (C) qPCR showing *CBX7* knockdown efficiency at the mRNA level in BF transduced with shCBX7. (D) Ectopic expression of mouse *Cbx7* by retroviral transduction shows an increase in *Cbx7* mRNA by qPCR. (E) qPCR analyses show that *Cbx7* expression downregulates the genes of the SILAC proteins in IMR-90 fibroblasts. Data is normalized to the control, and represent the mean  $\pm$  SD of 1-3 independent experiments. (F) Representative immunoblot showing an increase in  $\beta$ 3 subunit levels, concomitant with a decrease in CBX7 protein levels in BF transduced with shCBX7.  $\beta$ -Actin is used as loading control. (G) Representative immunoblot showing changes in  $\beta$ 3 subunit levels upon CBX7 knockdown or overexpression in IMR-90 fibroblasts.  $\beta$ -Actin is used as loading control.

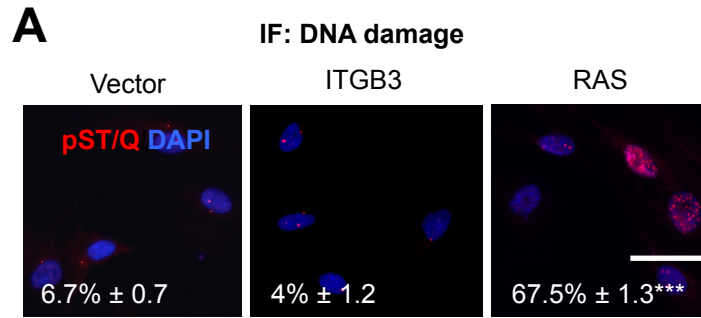

**ITGB3 induces senescence in IMR-90 fibroblasts**

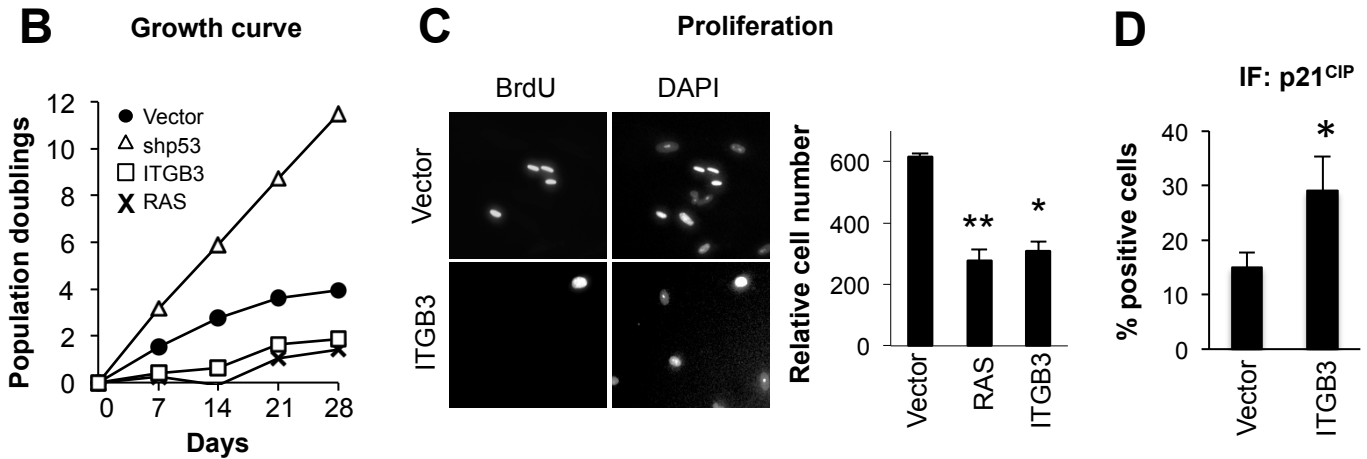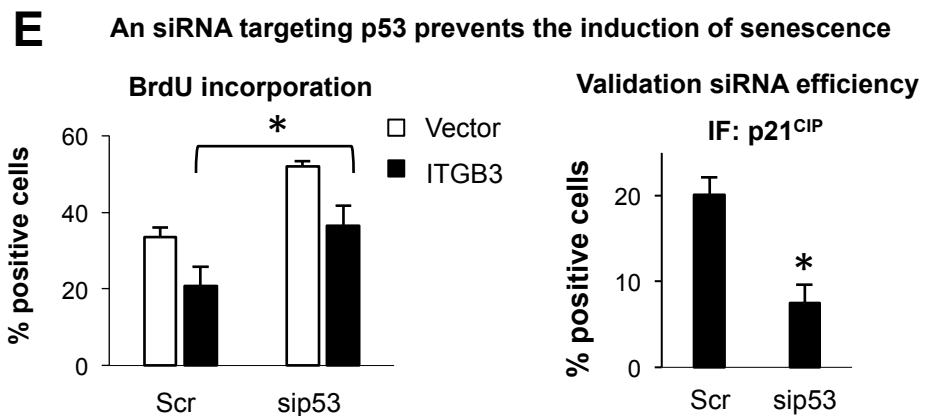

**Figure S2. ITGB3 induces senescence dependent on the p53 pathway (Related to Figure 3)**

(A) BF expressing ITGB3 do not display DNA damage, measured by pST/Q staining, and calculated by quantifying the percentage of cells positive for pST/Q staining. RAS was used as a positive control for DNA-damage in senescence. (B) IMR-90 primary fibroblasts transduced with a vector encoding ITGB3 show reduced proliferation, measured by calculating the population doubling growth curve. H-Ras<sup>G12V</sup> (RAS) and shp53 expressing fibroblasts were used as positive and negative regulators of senescence, respectively. (C) A reduction in the proliferation rate is also shown in representative pictures for BrdU incorporation (left panel) and by measuring the relative cell numbers (right panel). (D) IMR-90 fibroblasts expressing ITGB3 also show an increase in the percentage of cells staining positive for p21<sup>CIP</sup> protein by IF. (E) Disruption of *TP53* mRNA prevents the activation of senescence induced by the overexpression of ITGB3. BF expressing either Vector or ITGB3 were reverse-transfected with a Scramble (Scr) RNAi or an siRNA targeting p53 (sip53). Left panel: proliferation was quantified by measuring the percentage of cells incorporating BrdU. Right panel: Knockdown efficiency for sip53 was quantified by measuring the levels of p21<sup>CIP</sup>, a target of p53. Data represents the mean  $\pm$  SD of 2-3 independent experiments. Scale bar, 50 $\mu$ m

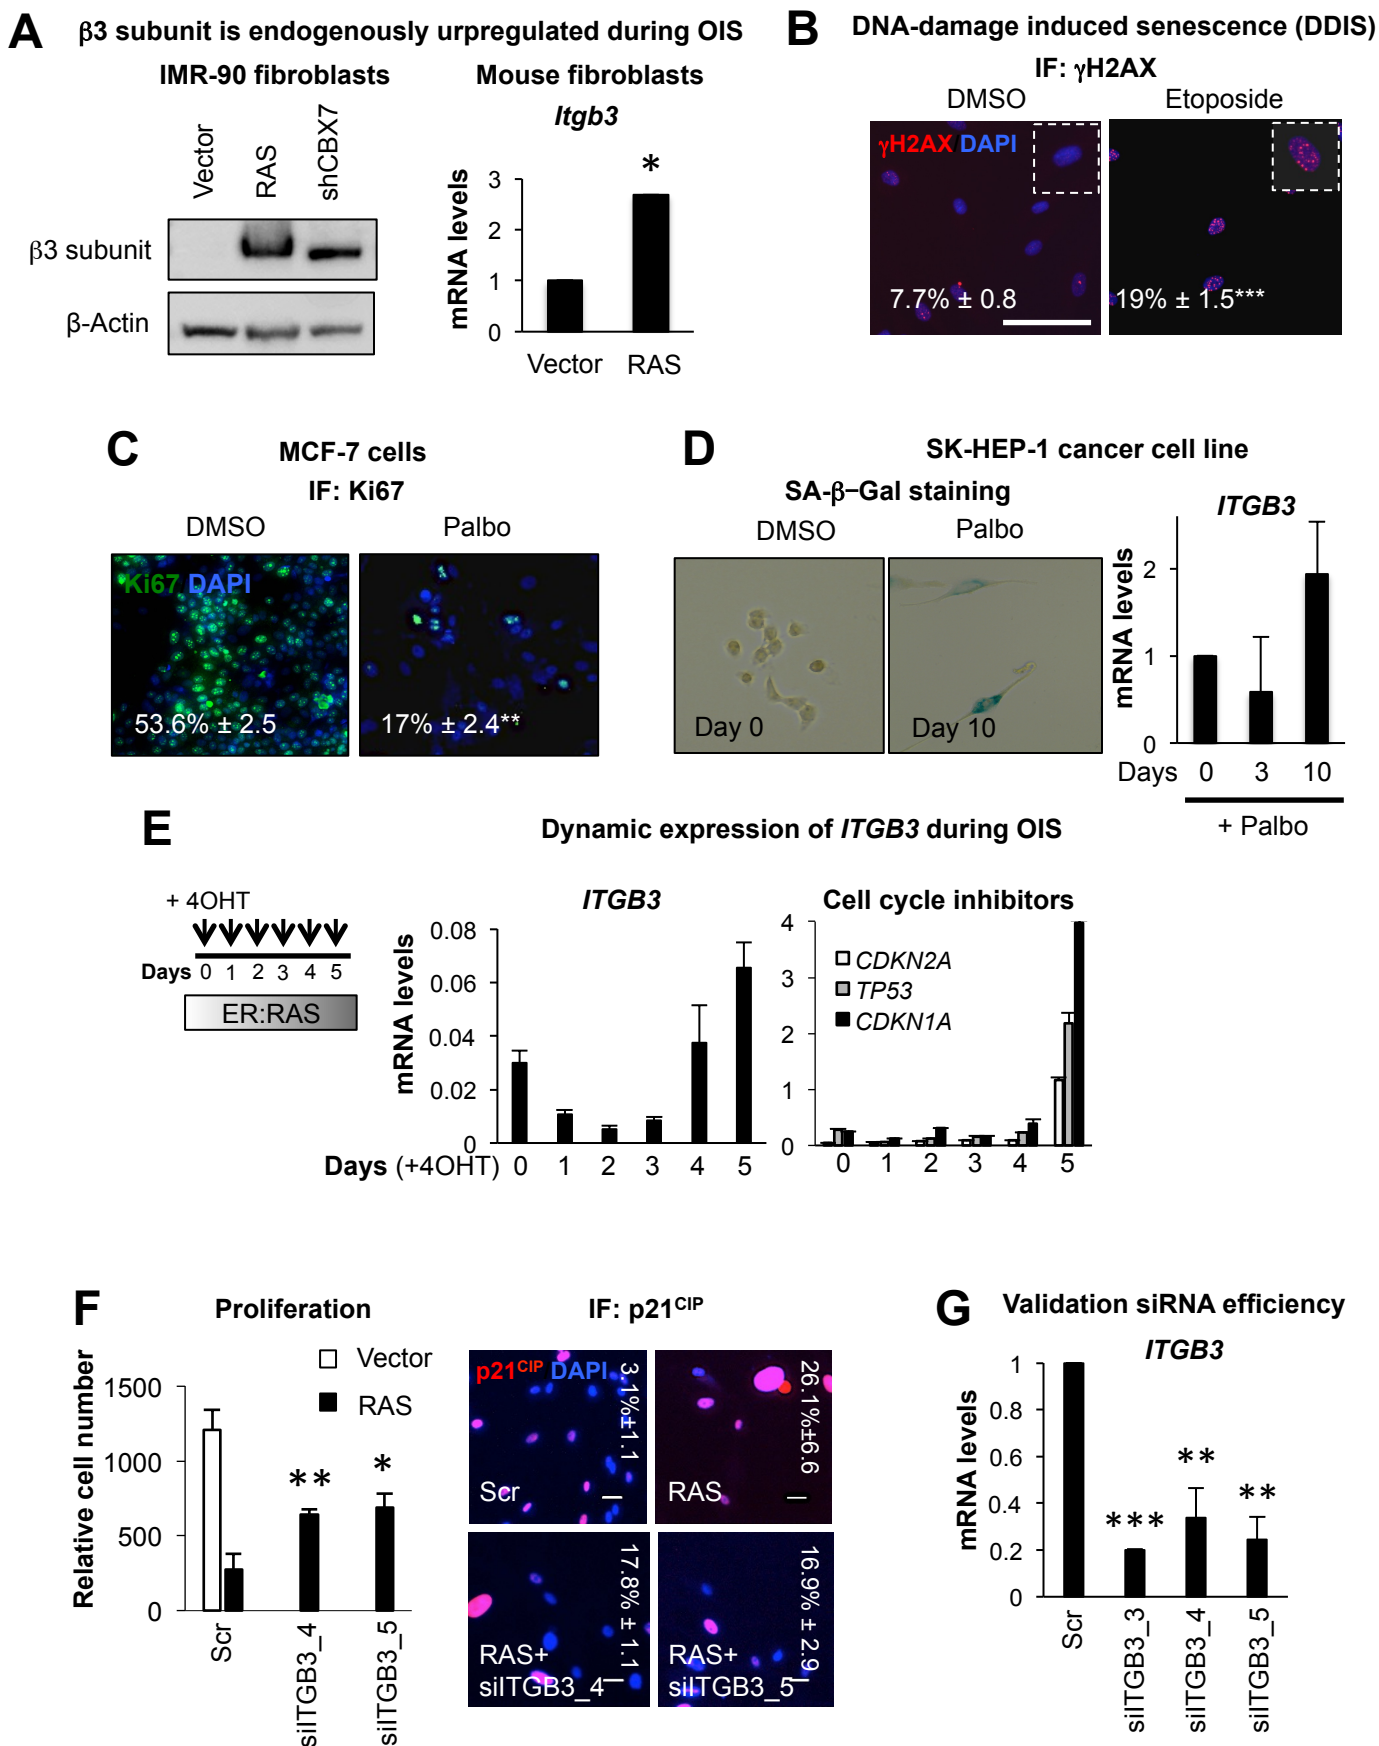

**Figure S3. *ITGB3* is a regulator of cellular senescence (Related to Figure 4)**

(A) Left panel shows immunoblot for  $\beta 3$  subunit in IMR-90 fibroblasts expressing RAS and shCBX7.  $\beta$ -Actin is used as loading control; right panel shows relative *Itgb3* mRNA levels upon RAS expression in mouse embryonic fibroblasts (MEFs) measured by qPCR. A representative qPCR is shown. (B) BF treated with etoposide show an increase in DNA-damage. This was measured by staining with a phospho- $\gamma$ -H2AX antibody by IF. The quantification represents the percentage of cells with positive staining. Scale bar, 50 $\mu$ m. (C) MCF7 breast cancer cells were treated with 200nM Palbociclib for 7 days. Proliferation was measured by staining with a Ki67 antibody. Data shows the percentage of cells staining positive for Ki67. (D) SK-HEP-1 hepatocellular carcinoma cells were treated with 1 $\mu$ M Palbo for 3 or 10 days and stained for SA- $\beta$ -Gal (left) or subjected to qPCR analyses for *ITGB3* mRNA levels (right panel). (E) *ITGB3* is dynamically regulated during cellular senescence. Time-course treatment with 200nM 4-Hydroxytamoxifen (4OHT) of fibroblasts harboring an ER:RAS construct. RNA was collected at different time points and subjected to qPCR analysis to determine *ITGB3*, *CDKN2A*, *TP53* and *CDKN1A* levels. (F) BF expressing vector or RAS were transfected with a scramble siRNA (Scr) or two different siRNA against *ITGB3* (siITGB3\_4 and 5). 4 days after transfection, BrdU was added and 24h later BrdU incorporation and p21<sup>CIP</sup> levels were assessed. Left panel: relative cell number. Right panel: representative images for p21<sup>CIP</sup> staining by IF. Scale bar, 100 $\mu$ m. (G) qPCR showing mRNA levels for *ITGB3* in BF fibroblasts transfected with three independent siRNA targeting *ITGB3* (siITGB3).

**A** An  $\alpha v\beta 3$  inhibitor does not bypass OIS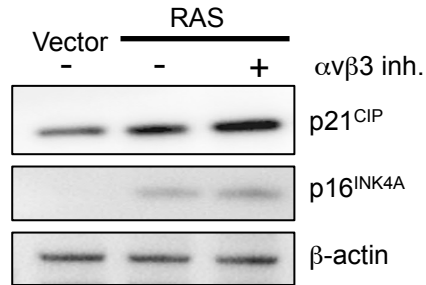**ITGB3<sup>D119A</sup> ligand-defective mutant induces senescence****B** BrdU incorporation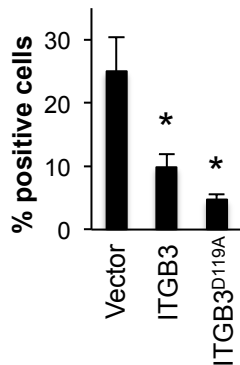**C** IF: p21<sup>CIP</sup>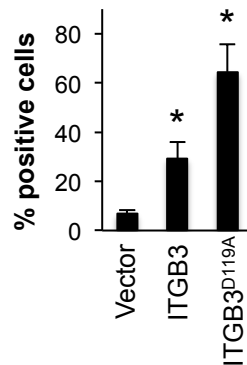**D** SA-β-Gal staining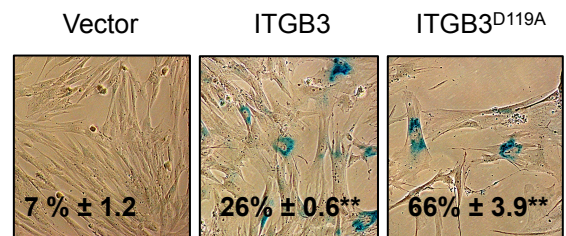**E**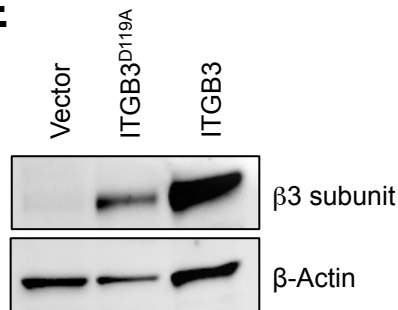



**Figure S4. ITGB3 induces senescence independently of its ligand-binding activity (Related to Figure 4)**

(A) Immunoblot for p21<sup>CIP</sup> and p16<sup>INK4A</sup> protein levels in BF cells expressing either Vector or RAS. RAS cells were treated with DMSO or 50nM of an  $\alpha$ v $\beta$ 3 inhibitor (cilengitide) for 48h, washed and followed by 72h of fresh media incubation.  $\beta$ -actin is shown as loading control. (B-D) Expression of an ITGB3 mutant construct (ITGB3<sup>D119A</sup>), defective for ligand-binding activity, induces senescence in BF fibroblasts. ITGB3 wild type is used as control. (B) BrdU proliferation is reduced in cells expressing ITGB3<sup>D119A</sup>, while (C) p21<sup>CIP</sup> protein levels and the (D) the percentage of cells staining positive for SA- $\beta$ -Gal are increased. (E) Immunoblot for  $\beta$ 3 subunit shows the expression levels for ITGB3 wild-type and mutant (ITGB3<sup>D119A</sup>) construct.

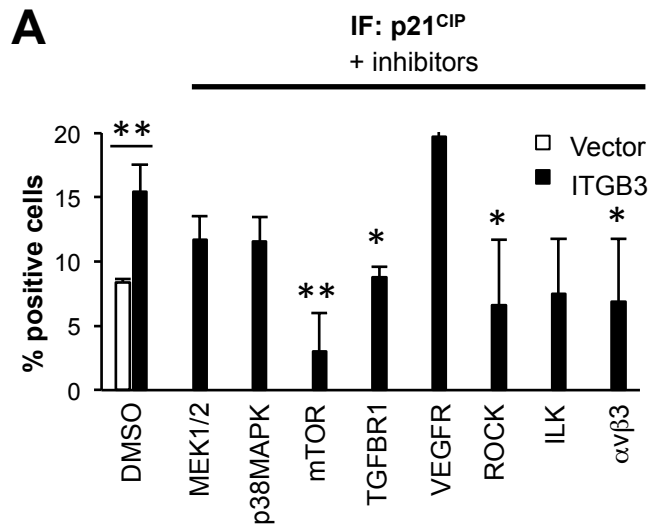

**B** Validation siRNA efficiency

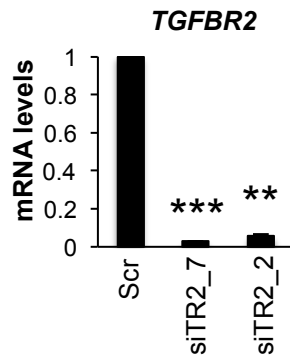

**C** Conditioned media (CM)

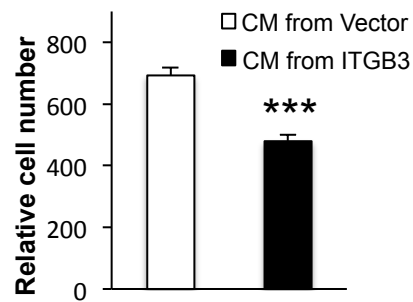

**Figure S5. ITGB3 induces senescence in a cell and non-cell autonomous fashion by activating the TGF $\beta$  pathway (Related to Figure 5)**

(A) BF expressing vector or ITGB3 were treated for 48h with a small molecule drug screen. The percentage of p21<sup>CIP</sup> positive cells with or without the inhibitors is shown. The graph indicates the inhibitor's targets. Inhibitor's details are: 40 $\mu$ M PD98059 (targeting MEK1/2), 20 $\mu$ M SB202190 (p38MAPK), 100nM TORIN2 (mTOR), 4 $\mu$ M TGF $\beta$ -R1 (TGFBR1), 8 $\mu$ M Vegfr-2/Flt3/C-Kit (VEGFR), 150nM GSK429286A (ROCK1/2, Rho-associated kinase), 50nM Cpd22 (ILK, integrin-linked kinase) and 50nM Cilengitide ( $\alpha$ v $\beta$ 3). (B) qPCR analyses to show the mRNA knockdown efficiency of the RNAi targeting *TGFBR2* (siTR2\_7 and siTR\_2). (C) Conditioned media (CM) from BF expressing either Vector or ITGB3 was used to treat normal BF cells. Conditioned media was produced in 0.5% FBS for 7 days. The relative cell number was calculated after treating the cells for 72h with the conditioned media.

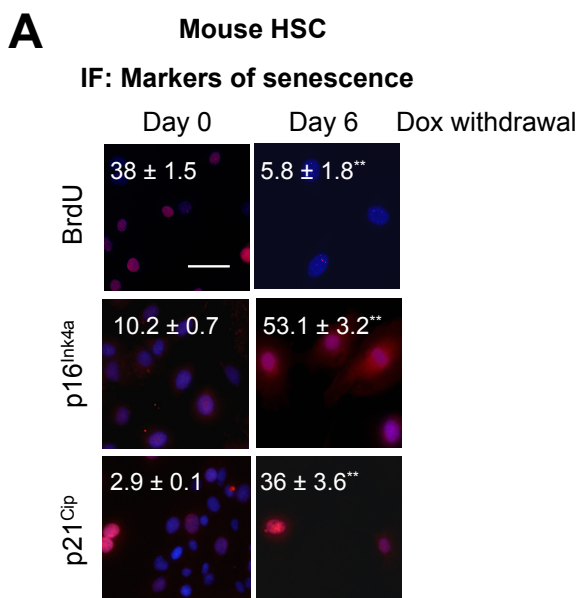

**B** SASP levels in Young and Old mice tissue

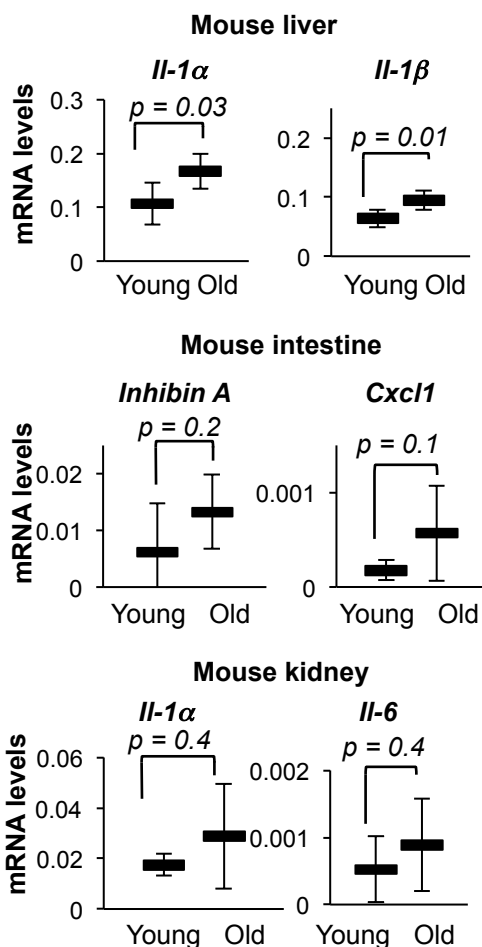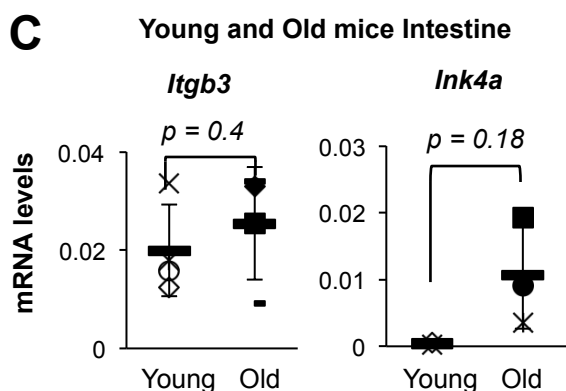

Fibroblasts from old human donors have characteristics of cellular senescence

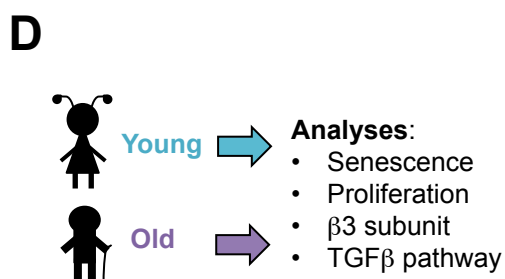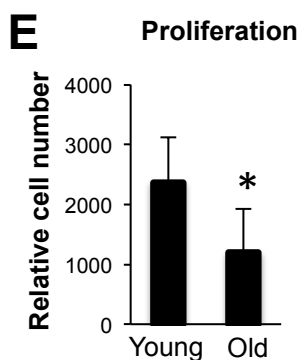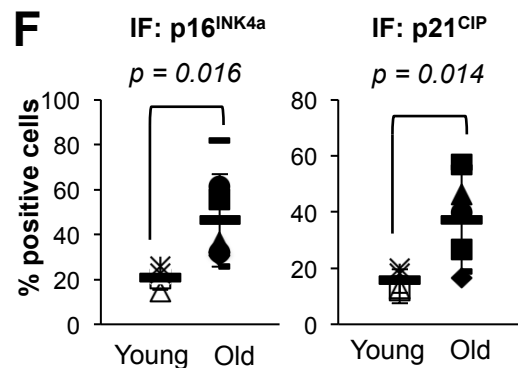

**G** IF:  $\alpha\beta 3$  /F-Actin staining

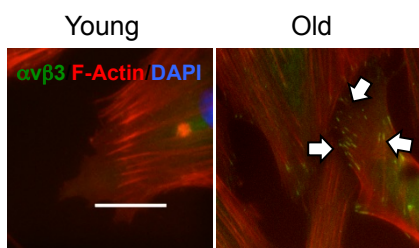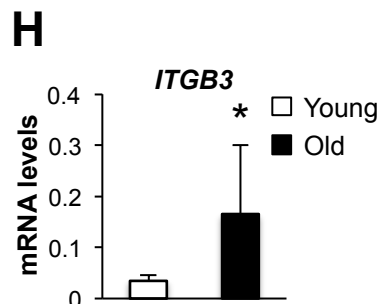

**Figure S6. ITGB3 is expressed during replicative senescence and aging in human and mouse (Related to Figure 6)**

(A) IF analysis for senescence markers (BrdU, p16<sup>Ink4a</sup> and p21<sup>Cip</sup>) in mouse Hepatic Stellate Cells (mHSC) upon different days of doxycycline (Dox) withdrawal. Quantification represents the percentage of cells staining positive for each antibody. (B) Additional markers of senescence/aging - different SASP mRNAs - were determined in different tissues (liver, intestine, and kidney) from mice aged 4 (Young) and 25 (Old) months. (C) Intestines from young (4 months) and old (25 months) C57BL/6J mice were subjected to qPCR to determine *Ink4a* and *Itgb3* mRNA expression levels. (D) Schematic representation of the strategy followed to determine the implication of the  $\beta 3$  subunit in aging in human fibroblasts. We analyzed primary fibroblasts from young (~10 years) and old (~80 years) human donors to check for markers of senescence,  $\beta 3$  subunit and regulators of TGF $\beta$ . (E) Fibroblasts from old donors (n=7 donors) show a lower proliferation rate than fibroblasts from young donors (n=4 donors). (F) Fibroblasts from old donors present different markers for senescence. Graphs represent the percentage of cells stained positive for p16<sup>INK4A</sup> and p21<sup>CIP</sup> in young and old fibroblasts. Data represents the mean  $\pm$  SD of fibroblasts derived from 4 young and 7 old donors. (G) Representative images for  $\alpha v\beta 3$  (green) and F-Actin (red) staining in young and old donor fibroblasts. The formation of FA is shown with white arrows in the old fibroblasts. Scale bar, 100  $\mu$ m. (H) qPCR analysis for *ITGB3* mRNA levels in fibroblasts from young and old donors.

**A** RNAi targeting ITGB3 reverses aging

IF: Markers of senescence

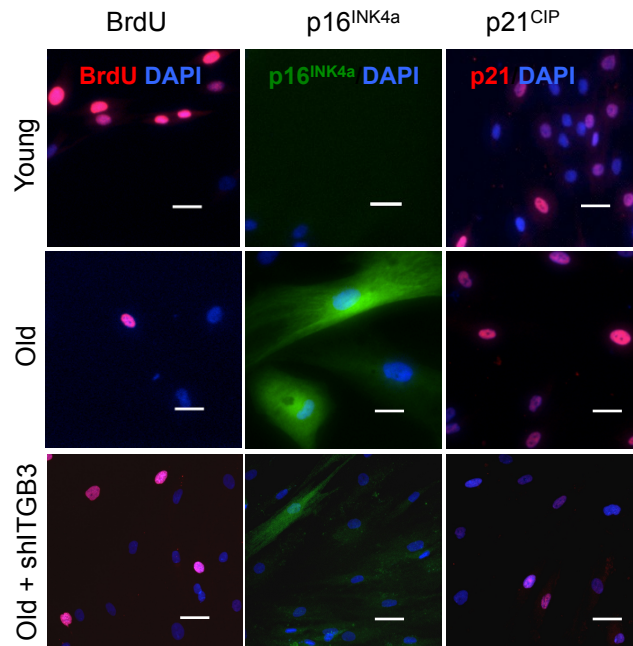

**Figure S7. Knockdown of *ITGB3* using a specific shRNA (shITGB3) averts senescence/aging markers in fibroblasts derived from old donors (Related to Figure7)**

(A) IF analysis for different markers of senescence/aging (BrdU, p16<sup>INK4A</sup> and p21<sup>CIP</sup>) in fibroblasts from old donors expressing an shRNA targeting *ITGB3* (shITGB3). Cells from young donors were used as controls.

## SUPPLEMENTAL EXPERIMENTAL PROCEDURES

### **Antibodies for immunofluorescence, immunoblotting and ChIP.**

Details of the antibodies used can be found in the Supplemental Table S2.

### **qPCR, immunoblotting and immunofluorescence**

Total RNA was extracted using Trizol Reagent (Invitrogen) according to the manufacturer's protocol. cDNA was generated using the High Capacity cDNA Reverse transcription kit (Invitrogen). For specific primers see the Supplemental Table S2. Protein extracts were processed and analyzed as before (O'Loughlen et al., 2012). Immunofluorescence was performed using an InCell Analyzer 1000 (GE). Image processing and quantification was performed using InCell Investigator software (GE) (Acosta et al., 2008). Primers and antibodies used in this study are listed in the Supplemental Table S2.

### **RNA interference experiments**

Indicated cells were transfected with 30nM of siRNA in a 96-well plate or 6-well plate. A 3.5% solution of HiPerFect transfection reagent (QIAGEN) was prepared in serum-free DMEM and then mixed with the siRNA. The mixture was incubated for 30 minutes at room temperature and then added to the cells. The medium was changed after 24 hours and cells were incubated for additional 24 hours before being processed for IF analysis or RNA/protein isolation. For RNAi targeting integrins, the forward transfection method was used, where the cells are plated first, senescence was induced and the siRNA/HiPerFect mixture was added after senescence was established. Experiments using an siRNA targeting p53 were reverse transfected, where the siRNA/HiPerFect mixture was added at the same time as cells were plated.

### **SA- $\beta$ -Galactosidase staining**

Cells were seeded at the same density and after 72h fixed with 0.5% Glutaraldehyde, washed with 1mM MgCl<sub>2</sub> pH 6.0 and stained with X-Gal staining solution (1mM MgCl<sub>2</sub> solution, 1X KC solution and X-Gal). Cells were incubated from 4h up to overnight at 37°C and stained with DAPI. The analysis of the percentage of SA- $\beta$ -galactosidase positive cells was performed using the plugin Cell Counter in the ImageJ software. SA- $\beta$ -Gal positive cells were determined as the percentage of cells staining blue (light or dark blue) with respect to the total amount of cells.

### **Chromatin immunoprecipitation (ChIP)**

ChIP assay was performed using BF. Cells were cross-linked in 1% paraformaldehyde for 10 minutes at room temperature. Fixed cells were lysed in Lysis Buffer [50 mM HEPES (pH 7.5), 140 mM NaCl, 1 mM EDTA, 0.1% IGEPAL 630 (Sigma-Aldrich)], containing 0.05% Triton X100, 2.5 % glycerol and supplemented with 1X protease inhibitor cocktail (Roche) for 30 minutes on ice, followed by centrifugation incubation in Buffer 2 [0.1 M Tris HCl (pH 8) and 200 mM NaCl with protease inhibitors] for 30 minutes at room temperature. Chromatin was sonicated as follows: three cycles of 10 minutes each (30 seconds on followed by 30 seconds off). Crosslinked DNA after sonication was precipitated with 5  $\mu$ g of anti-CBX7, anti-CBX8 and anti-RING1B antibodies or non-immune mouse/rabbit IgG (Abcam) overnight at 4°C. Chromatin/antibody complex was pulled down with Dynal Protein G or Dynal Protein A magnetic beads (Invitrogen) and washed in the low- and high-salt buffers. After de-crosslinking (65°C for 4 hours) and Proteinase K treatment, chromatin was purified by phenol-chloroform extraction and isopropanol precipitation. The antibodies used and qPCR primers are listed in the Supplemental Table S2.

### **SILAC (Stable Isotope Labeling with Aminoacids in Culture) Mass Spectrometry.**

SILAC-labeled vector and shCBX7 fibroblasts were generated as before (O'Loughlen et al., 2012). Protein extracts were separated by SDS-PAGE and subjected to overnight in gel trypsin digestion. Peptide extracts were analyzed using a Q-Exactive mass spectrometer coupled to an Ultimate3000 LC (both



Thermo Fisher) using an Easy Spray Nano-source. The instrument was operated in data dependent acquisition mode selecting the 10 most intense precursor ions for fragmentation. Raw data was processed using MaxQuant/Andromeda as previously described (Cox and Mann, 2008). Outlier detection was performed using the significance B option available in Perseus software with a p-value cut-off of 0.05 for significance. Proteins were selected as significant when a two-fold difference in expression levels was observed. Proteomic data can be found in the Supplemental Table S1.

#### **Pathways analysis KEGG**

KEGG pathway analysis was performed on upregulated and downregulated proteins using DAVID Functional Annotation Bioinformatics Microarray Analysis (Huang da et al., 2009).

#### **Mice tissue**

All tissues (liver, kidney and intestine) come from female C57BL/6J mice. All mice (4, 19 and 25 month-old) were maintained in the same housing with identical environmental conditions. Tissues were provided by the Tissue Bank provider ShARMUK.

#### **SUPPLEMENTAL REFERENCES**

Cox, J., and Mann, M. (2008). MaxQuant enables high peptide identification rates, individualized p.p.b.-range mass accuracies and proteome-wide protein quantification. *Nature biotechnology* 26, 1367-1372.

Huang da, W., Sherman, B.T., and Lempicki, R.A. (2009). Systematic and integrative analysis of large gene lists using DAVID bioinformatics resources. *Nature protocols* 4, 44-57.



|          |          |          |          |            |         |    |    |    |    |         |         |         |         |         |         |            |            |                             |                            |    |
|----------|----------|----------|----------|------------|---------|----|----|----|----|---------|---------|---------|---------|---------|---------|------------|------------|-----------------------------|----------------------------|----|
| -1.41074 | -1.77448 | 1.81824  | 2.38225  | 7.70E-28   | 7.71423 | 5  | 3  | 6  | 3  | 7.64488 | 7.50598 | 7.08221 | 6.88326 | 6.1813  | 6.7871  | 0.0184398  | 0.0122381  | Q13423;Q2T1                 | NAD(P) trans NNT           | 9  |
| 1.51485  | 1.29748  | -2.01526 | -1.37778 | 1.24E-17   | 7.16587 | 2  | 4  | 1  | 4  | 6.4442  | 5.82379 | 6.32521 | 7.07445 | 6.98452 | 6.34641 | 0.052458   | 0.0284737  | Q13219;B4D                  | Pappalysin-1 PAPPA         | 6  |
| -1.40354 | -1.71227 | -1.82941 | -1.4079  | 5.32E-07   | 7.13906 | 2  | 3  | 2  | 2  | 6.88335 | 6.67619 | 6.46241 | 6.78743 | 6.67758 | 6.13669 | 0.106926   | 0.116938   | Q3YEC7;G8JL                 | Rab-like prot PARF;C9orf81 | 10 |
| 2.61565  | 2.08257  | -2.34512 | -1.57248 | 0          | 9.65351 | 0  | 0  | 42 | 68 | 9.27114 | 8.47614 | 9.19526 | 9.42095 | 9.32775 | 8.70679 | 8.48E-07   | 7.72E-05   | B4DRT3;E7E1                 | Pyruvate kin; PKM2         | 3  |
| NaN      | NaN      | -2.93832 | -2.11866 | 4.13E-219  | 7.41868 | 0  | 1  | 0  | 2  | NaN     | NaN     | NaN     | 7.41868 | 7.36524 | 6.48237 | 1          | 0.00132424 | E7ETU9;B4DHG3;B3KWS3; PLOD2 |                            | 6  |
| 1.82244  | 1.25635  | -2.42973 | -1.80591 | 8.57E-300  | 8.78436 | 8  | 9  | 13 | 11 | 8.46112 | 7.82859 | 8.3459  | 8.50444 | 8.42886 | 7.70788 | 0.00595468 | 0.00040434 | B2R6X6;P304                 | Peptidyl-prol PPIF         | 13 |
| 2.55159  | 2.20402  | -2.89218 | -2.19621 | 1.07E-53   | 8.34974 | 6  | 9  | 10 | 16 | 7.9222  | 6.99217 | 7.86792 | 8.14656 | 8.08714 | 7.25324 | 1.55E-05   | 3.49E-05   | P26022                      | Pentraxin-rel PTX3         | 1  |
| 1.69737  | 1.27471  | -1.71317 | -1.01162 | 1.55E-63   | 8.56378 | 3  | 4  | 15 | 15 | 8.45643 | 7.80347 | 8.34721 | 7.90421 | 7.76884 | 7.33201 | 0.00532229 | 0.0501373  | Q92930;HOY1                 | Ras-related p; RAB8B       | 10 |
| 2.47902  | 2.01489  | -3.0308  | -2.37452 | 6.72E-48   | 8.14891 | 2  | 5  | 2  | 4  | 7.23277 | 6.4755  | 7.14931 | 8.09276 | 8.03687 | 7.17464 | 0.00165224 | 8.05E-06   | A8K3J8;P550                 | GTP-binding RRAD           | 5  |
| 1.37995  | 0.823749 | -2.22553 | -1.57192 | 3.53E-82   | 9.46984 | 6  | 5  | 66 | 53 | 9.23454 | 8.69557 | 9.08636 | 9.09132 | 9.00711 | 8.33754 | 0.0584186  | 0.0005176  | D3DV26;P60                  | Protein S100 S100A10       | 3  |
| 1.56866  | 1.1036   | -1.95137 | -1.23416 | 1.06E-07   | 6.91916 | 2  | 1  | 2  | 1  | 6.85284 | 6.26309 | 6.72372 | 6.0703  | 5.96909 | 5.38803 | 0.0886865  | 0.165572   | P29034;Q5R1                 | Protein S100 S100A2        | 2  |
| 1.69995  | 1.14841  | -2.09486 | -1.45918 | 1.88E-40   | 7.88545 | 6  | 5  | 6  | 6  | 7.64803 | 7.04187 | 7.52445 | 7.50986 | 7.41469 | 6.80391 | 0.0222084  | 0.0268856  | P33764                      | Protein S100 S100A3        | 1  |
| 1.83435  | 1.47566  | -2.50611 | -1.83259 | 2.04E-224  | 9.46046 | 2  | 2  | 37 | 43 | 8.8674  | 8.12898 | 8.77982 | 9.33248 | 9.24878 | 8.57624 | 0.00093411 | 3.48E-06   | B2R7Y0;H7BYS2;H7C004;E      | SERPINB10                  | 4  |
| 2.74966  | 2.17702  | -3.35868 | -2.65608 | 1.87E-169  | 8.14882 | 2  | 1  | 4  | 2  | 7.91954 | 7.04021 | 7.85804 | 7.76178 | 7.72702 | 6.64779 | 1.92E-05   | 4.62E-07   | P05120;E7EP                 | Plasminogen SERPINB2       | 3  |
| 2.31136  | 1.79086  | -2.21632 | -1.49387 | 9.21E-29   | 8.32595 | 7  | 6  | 8  | 7  | 7.96501 | 7.26724 | 7.8678  | 8.07755 | 7.95839 | 7.45761 | 0.00034582 | 0.00419985 | P05121;F8W                  | Plasminogen SERPINE1       | 7  |
| 1.50294  | 0.987757 | -2.43893 | -1.48201 | 1.34E-184  | 8.72054 | 11 | 18 | 17 | 20 | 8.20542 | 7.60987 | 8.07828 | 8.56227 | 8.48048 | 7.79689 | 0.0238949  | 0.00358171 | Q9H788;HOY                  | SH2 domain- SH2D4A         | 2  |
| -1.82337 | -2.19106 | 2.06533  | 2.77964  | 1.28E-18   | 7.90064 | 3  | 5  | 3  | 5  | 7.10195 | 7.01812 | 6.34633 | 7.82545 | 7.28344 | 7.6785  | 0.00452962 | 3.99E-05   | D9HTE9;Q6L                  | Tricarboxylat SLC25A1      | 4  |
| 1.70867  | 1.40746  | -1.65676 | -1.18761 | 5.37E-06   | 6.97997 | 1  | 1  | 1  | 1  | 6.79385 | 6.1002  | 6.6956  | 6.52222 | 6.39291 | 5.93303 | 0.0380997  | 0.180887   | B7ZLQ5;P28                  | Probable glol SMARCA1      | 7  |
| 1.67224  | 1.20069  | -2.01841 | -1.24646 | 0          | 9.49624 | 19 | 24 | 30 | 43 | 9.0844  | 8.3987  | 8.98408 | 9.28341 | 9.16679 | 8.65549 | 0.00651447 | 0.00199033 | P52788;B4Df                 | Spermine syr SMS           | 3  |
| 1.43563  | 0.91311  | -2.16961 | -1.495   | 4.22E-10   | 7.33157 | 3  | 2  | 4  | 2  | 7.14476 | 6.58583 | 7.00445 | 6.87512 | 6.77938 | 6.17143 | 0.113026   | 0.0971982  | P37840;H6U                  | Alpha-synucl SNCA          | 6  |
| 2.93172  | 2.45375  | -3.74101 | -2.83516 | 1.26E-12   | 7.02284 | 3  | 3  | 3  | 3  | 6.80456 | 5.65401 | 6.7727  | 6.61954 | 6.55229 | 5.77626 | 0.00080037 | 0.00224189 | O76070;Q6F1                 | Gamma-synu SNCG            | 4  |
| 1.63338  | 1.32343  | -1.80682 | -1.18187 | 3.57E-06   | 7.37146 | 2  | 1  | 3  | 1  | 7.19769 | 6.54683 | 7.08789 | 6.8896  | 6.82061 | 6.05664 | 0.0302831  | 0.182846   | D2JY11;A3QNTG               | F-beta rec TGFBR2          | 5  |
| 1.4197   | 1.00813  | -3.20051 | -2.67355 | 0.00028262 | 6.86025 | 1  | 1  | 1  | 1  | 6.56071 | 5.98134 | 6.42792 | 6.55775 | 6.52842 | 5.3726  | 0.112813   | 0.00388153 | Q96HP8;H7C                  | Transmembr TMEM176A        | 4  |
| -1.58701 | -2.04258 | 1.98939  | 2.6893   | 4.54E-09   | 7.79993 | 2  | 2  | 3  | 2  | 7.63155 | 7.47387 | 7.11508 | 7.30698 | 6.61731 | 7.20772 | 0.00597974 | 0.00024261 | Q99785;E9PFF                | Tumor prote TP53I11        | 13 |
| 1.49978  | 0.965175 | -2.01392 | -1.36702 | 4.00E-233  | 9.25249 | 16 | 24 | 25 | 45 | 8.66165 | 8.10332 | 8.5211  | 9.12375 | 9.0089  | 8.48994 | 0.0299951  | 0.00257331 | Q16222;B1A1                 | UDP-N-acety UAP1           | 2  |
| -1.52891 | -1.65381 | -1.9143  | -1.2137  | 1.38E-06   | 7.03104 | 1  | 1  | 1  | 2  | 6.20874 | 6.06187 | 5.66644 | 6.96019 | 6.84334 | 6.3329  | 0.122118   | 0.172177   | P63146;HOY                  | Ubiquitin-coi UBE2B        | 3  |
| 1.72583  | 1.49093  | -3.07534 | -2.31058 | 0.00046673 | 7.19218 | 1  | 1  | 1  | 1  | 7.06002 | 6.38714 | 6.95633 | 6.61111 | 6.5672  | 5.68195 | 0.0162255  | 0.0121038  | P17029;B3KK                 | Zinc finger p1 ZKSCAN1     | 5  |

**Table S2. List of reagents used in this study (Related to Figures 1-7)**

**Primer sequences for qPCR analyses used in this study**

| HUMAN             |                                |                               |
|-------------------|--------------------------------|-------------------------------|
| Target            | Forward primer                 | Reverse primer                |
| RPS14             | CTGCGAGTGCTGTCAGAGG            | TCACCGCCTACACATCAAACCT        |
| INK4A             | CGGTCGGAGGCCGATCCAG            | GCGCCGTGGAGCAGCAGCAGCT        |
| TP53              | TGGCCATCTACAAGCAGTCA           | GGTACAGTCAGAGCCAACCT          |
| CBX7              | AACTCCATCACCGTCACCTT           | CCCCAACCCATCCCTATCTC          |
| NDUFA13           | CTACGGGCACTGGAGCATAA           | AGCGGGTGTGTGGAACA             |
| S100A3            | CAGATTGGTAAACACCCGAAC          | ACAAAGTCCACCTCGCAGTC          |
| TGFBR2            | CGGCTCCCTAAACACTACCA           | TATGTCACCCACTCCCTGCT          |
| AIM1              | TCCCCAGAAAGTGAAGGAAA           | TGTTGGAAGAGCAGCGTATG          |
| DUSP22            | GAAAGGGGAGTGTGGCTGTA           | GCGGCTGTGAAGAAAGAACA          |
| RAB8B             | GCACATCAGTGTAGCCTTTCC          | TGAACCAGACCAAATACCCTTT        |
| NNT               | GATACGGGTTTTGGGCATTG           | CCCTGAGAAGTTGTGGAAGG          |
| ITGB3             | GGGGTAGGTTGGGAGAATGT           | TCTGGGACAAAGGCTAAGGA          |
| SMS               | GCACAGCGAAGACTGTAAA            | GGGGAAAGAAACACCATCAA          |
| SNCA              | TTCTGGGGCATAGTCATTTCT          | TTCTCCTTCCTTCCTCACC           |
| ZKSCAN1           | CCATTTCCCCCTTTTGTTC            | TGCGTGTGCTTTTCTTGT            |
| ITGA2             | GGATTTGTTGGCTGACTGG            | GATAACTTTGGACCGCTGGA          |
| EHD3              | CCCACCACAGACTCCTTCAT           | GCTCTCCAGCACAGGGTTAG          |
| MAGED2            | CAGGCATACTGGGAACGACT           | GCTATTGGGGACTCTGGCATA         |
| S100A2            | AAGACTGGCGACAAGTTCAAG          | TGATGAGTGCCAGGAAAACA          |
| ARMC8             | TCCTCTCCACTCGTCTCAT            | GTTGTCCCATCCGCTATGTT          |
| DAPK1             | GAAGCAAGGGGGTGTAGTAG           | CCACAGACAACGGAATGAGA          |
| SH2D4A            | ATGCCCTGTCTATCTGTGCG           | TGGAGGCTGTCACTCAAACA          |
| FILIP1L           | AAACGCCTCCATAACACCAG           | AACCAGTCACAGCCAAAACC          |
| GRO alpha         | GAAAGCTTGCTCAATCCTG            | CACCAGTGAGCTTCTCCTC           |
| GCP2              | AGAGCTGCGTTGCACTTGTT           | GCAGTTTACCAATCGTTTGGGG        |
| CCL2              | AGCTCGCACTCTCGCCTCCAG          | GGCATGTATTGCATCTGGCTGAGC      |
| IL-1 beta         | TGCACGCTCCGGGACTCACA           | CATGGAGAACCACACTTGTGCTCC      |
| IL-8              | GAGTGGACCACACTGCGCCA           | TCCACAACCCTTGACCCAGT          |
| IL-6              | CCAGGAGCCAGCTATGAAC            | CCCAGGGAGAAGGCAACTG           |
| IL-11             | CCTGGCTCTTCCCCATCTAG           | CAGCTCTCAGACAAATCGCC          |
| TGFB1             | TAC TAC GCC AAG GAG GTC AC     | GCT GAG GTA TCG CCA GGA AT    |
| TGFB2             | TTT GGA AGT TTG TGT TCT GTT TG | TGT TGT TGT TGT CGT TGT TCA C |
| TGFB3             | ACA CAC AAG CAA CAA ACC TCA C  | TCC TCT AAC CAA ACC CAC ACT T |
| SMAD2             | GCAAAAAGGTTCACTAAAGGA          | AGCAAAGGTTGAGGAAGGAGATA       |
| SMAD3             | TGATGTTAGAGGGGAGATGGAGAG       | GAGGAAGTGAGGGGTTTGTATT        |
| SMAD4             | ACCCAGCTCTGTTAGCCCCA           | TGGCAGGCTGACTTGTGGAAGC        |
| TGFBR1 (ALK5)     | TCTGCCACAACCGCACTGTCA          | GGTAAACCTGAGCCAGAACCCTGACG    |
| LTBP1             | GAG TGC TGC TGT CTG TAT GGA G  | AAACGGTCTTGGATGAAGTAGG        |
| LTBP3             | GGA GGA GAA GAG CCT GTG TTT    | GTG GGA GGT GAG AAT GTG GTA T |
| CDKN2B (p15INK4B) | ACCAGATAGCAGAGGGGTAAGAG        | GTGTGTGTGTGTGTGTGAAAAG        |
| CDKN1B (p27KIP)   | CCAGTCCATTTGATCAGCGG           | ACATCTTCTCCCGGGTCTG           |
| MMP1              | CAAATGCAGGAATCTTTGGGC          | GTAGGTCAGATGTGTTTGTCTCC       |
| MMP9              | AACTTTGACAGCGACAAGAAAGT        | ATTCAGTCGTCCTTATGCAAG         |
| ITGB1             | TGTGGTTGCTGGAATTGTTCTT         | ATTCAGTGTGTGGGATTTGCA         |
| ITGB2             | ATGTGGATGAGAGCCGAGAG           | ACTGGGACTTGAGCTTCTCC          |
| ITGB4             | ACTACACCCTCACTGCAGAC           | TCTGGCTTGCTCCTTGATGA          |
| ITGB5             | AACCAGAGCGTGTACCAGAA           | AGGAGAAGTTGTGCGCACTCA         |
| ITGB6             | GAAGGGGTGACTGCTACTGT           | TGCACACACATTCACCACAG          |
| ITGB7             | AAGTTGGGCGGCATTTTCAT           | CCCCAACTGCAGACTTAGGA          |
| ITGB8             | CCCAGAATCACTCCAACCCT           | GTGAACCCTAATTGCGCCAT          |
| MOUSE             |                                |                               |
| Ink4a             | GTGTGCATGACGTGCGGG             | GCAGTTCGAATCTGCACCGTAG        |
| Rps14             | GACCAAGACCCTGGACCT             | CCCCTTTTCTCGAGTGCTA           |
| Itgb3             | AACCACTACTCTGCCTCCAC           | ACTGTGGTCCCAGGAATGAG          |
| TP53              | AAACGCTTCGAGATGTTCCG           | GTAGACTGGCCCTTCTTGGT          |
| Cdkn1a (p21CIP)   | TCCCCACTCTTGACATTGCT           | TGCAGAAGGGGAAGTATGGG          |
| Cxcl1             | CTGGGATTCACCTCAAGAATC          | CAGGGTCAAGGCAAGCCTC           |
| Inhibin A         | GATCATCACCTTTGCCGAGT           | TGGTCTGTTCTGTTAGCC            |
| Il-1 alpha        | CGCTTGAGTCGGCAAAGAAAT          | TGGCAGAACTGTAGTCTTCGT         |
| Il1 - beta        | TGCCACCTTTTGACAGTGATG          | TGATGTGCTGCTGCGAGATT          |
| Il-6              | TGATTGTATGAACAACGATGATGC       | GGACTCTGGCTTTGTCTTTCTTGT      |
| Cbx7              | TGCGGAAGGGCAAAGTTGAAT          | ACAAGGCGAGGGTCCAAGA           |

### Primer sequences for ChIP-qPCR analyses used in this study

| Target       | Forward primer        | Reverse primer         |
|--------------|-----------------------|------------------------|
| ARF          | GTGGGTCCCAGTCTGCAGTTA | CCTTTGGCACCAGAGGTGAG   |
| ACTB         | CCGTTCCGAAAGTTGCCTT   | CGCCGCCGGGTTTATA       |
| INK4A        | ACCCCGATTCAATTTGGCAG  | AAAAAGAAATCCGCCCCCG    |
| ITGB3 TSS    | CTGAAGACACGTGCCCAAGG  | TCCGTCTCTAACCTGGAAGTCC |
| ITGB3 Coding | GTGCAGTGGTGTGATCCCTG  | AGCATTTTGGGAAGCCGAGG   |
| SNCA         | GGAGTCGGAGTTGTGGAGAA  | GGGACAAGTACTCACCTCCC   |
| ZKSCAN       | AAAAGTAAATCTGGCCGGGC  | TCCCAGGTTCAAGCGATTCT   |
| S100A2       | CCCATCCTTCCAGACACCTT  | TGAGAGAGAAGCAACCTGGG   |
| ITGA2        | TGCTGGAAAATTTGTGGCAA  | TGAGAGCCCATAATGCACT    |
| ARMC8        | AAACTCCAGTGCCTGTCTT   | ATGGGGCAGAACATAACCCT   |
| DUSP22       | CCGCTGACTTGTGACACTG   | TGTTCAATCCCATTTCCCATG  |
| S100A3       | GAAGGGACAGTGGAAAGTGG  | AAGTTGGGGTTCATCTACC    |
| TGFBR2       | GCGCTGAGTTGAAGTTGAGT  | AGATGTGCGGGCCAGATG     |
| SH2D4A       | GTCTCCTTCCTCCAGCCTT   | ATCTGCAGATCTGGGCCTTT   |
| AIM1         | CGGTCGTGATTACTCCAGA   | CCCGCCGAGATTTCACTTTC   |
| FILIP1L      | CAAAGGTGGAAGGTGCATC   | TCCCAAATCCCATCCTCCC    |
| RAB8B        | CTCTCCACCGCCTCCTCT    | GGTGGAGATGAAGGTGGTGT   |
| DAPK1        | CTTCGGAGTGTGAGGAGGAC  | GGGAACACAGCTAGGGAGTG   |

### RNAi sequences used in this study

| siRNA      |                       |
|------------|-----------------------|
| Target     | Sequence              |
| siTP53_7   | CAGCATCTTATCCGAGTGGAA |
| siITGB3_3  | CTCTCCTGATGTAGCACTTAA |
| siITGB3_4  | CAAGCTGAACCTAATAGCCAT |
| siITGB3_5  | CACGTGTGGCCTGTCTTCTTA |
| siTGFBR2_2 | TCGCTTTGCTGAGGTCTATAA |
| siTGFBR2_7 | TCGGTTAATAACGACATGATA |
| shRNA      |                       |
| Target     | Sequence              |
| TP53       | GTAGATTACCACTGGAGTC   |
| CBX7       | CGGAAGGGTAAAGTCGAGT   |
| ITGB3      | GATGCAGTGAATTGTACCTAT |

### Antibodies used in this study

| Target                  | Catalogue n. - Clone | Application    | Concentration |
|-------------------------|----------------------|----------------|---------------|
| CBX7                    | Ab21873              | ChIP, WB       | 1/200         |
| CBX8                    | A300-882A            | ChIP           | 1/200         |
| RING1B                  | Ab3832               | ChIP           | 1/200         |
| IgG                     | Ab18443 - MOPC21     | ChIP           | 1/200         |
| p16INK4A                | sc-56330 - JC-8      | WB             | 1/200         |
| $\beta$ -tubulin        | sc-9104              | WB             | 1/500         |
| ITGB3 or $\beta$ 3      | Ab179473 - ERP17507  | WB, IF         | 1/200         |
| $\beta$ -Actin          | sc-47778             | WB             | 1/500         |
| p21CIP                  | Ab109520             | IF             | 1/200         |
| BrdU                    | A21303               | IF             | 1/200         |
| $\alpha$ v $\beta$ 3    | LM609                | blocking Ab    | 10 $\mu$ g/ml |
| p53                     | sc-126 - DOI         | IF             | 1/200         |
| Pan TGF $\beta$ 1-3     | AB-100-NA            | blocking Ab/WB | 10 $\mu$ g/ml |
| IgG blocking antibodies | ab18413              | blocking Ab    | 10 $\mu$ g/ml |
| pST/Q                   | 9607                 | IF             | 1/200         |
| Ki67                    | ab15580              | IF             | 1/500         |
| SMAD2/3                 | 5678S                | IF             | 1/200         |
| CXCL6/IL-6              | AB-206-NA            | WB/IF          | 1:250/1:200   |
| CXCL8/IL-8              | 6217                 | WB/IF          | 1:500/1:200   |

### Inhibitors used in this study

| Name                               | Target                                     | Catalogue n. | Concentration |
|------------------------------------|--------------------------------------------|--------------|---------------|
| PD98059                            | MEK1/2                                     | 99005        | 40 $\mu$ M    |
| SB202190                           | p38MAPK                                    | sc-222294    | 20 $\mu$ M    |
| Torin-2                            | mTOR                                       | 14185        | 100 nM        |
| Tgf- $\beta$ Ri Kinase Inhibitor I | Tgf- $\beta$ Ri Kinase Inhibitor I         | 61645        | 4 $\mu$ M     |
| Vegfr-2/Flt3/C-Kit                 | Vegfr-2/Flt3/C-Kit                         | 676500       | 8 $\mu$ M     |
| Etoposide                          | DNA damage                                 | 341205       | 100 $\mu$ M   |
| PD0332991 (Palbociclib)            | CDK4/6                                     | A8316        | 200 nM        |
| GSK429286A                         | ROCK1/2                                    | Ab1466581    | 150 nM        |
| ILK Inhibitor, Cpd22               | ILK                                        | 40733        | 50 nM         |
| Cilengitide                        | $\alpha$ v $\beta$ 3/ $\alpha$ v $\beta$ 5 | A12372       | 50 nM         |
